# Supplementary material
Source: PubMed Central journal article supplement (PMC6988845)
Supplement: fj.201700692RR.sf1.pdf [file fj.201700692RR.sf1.pdf]

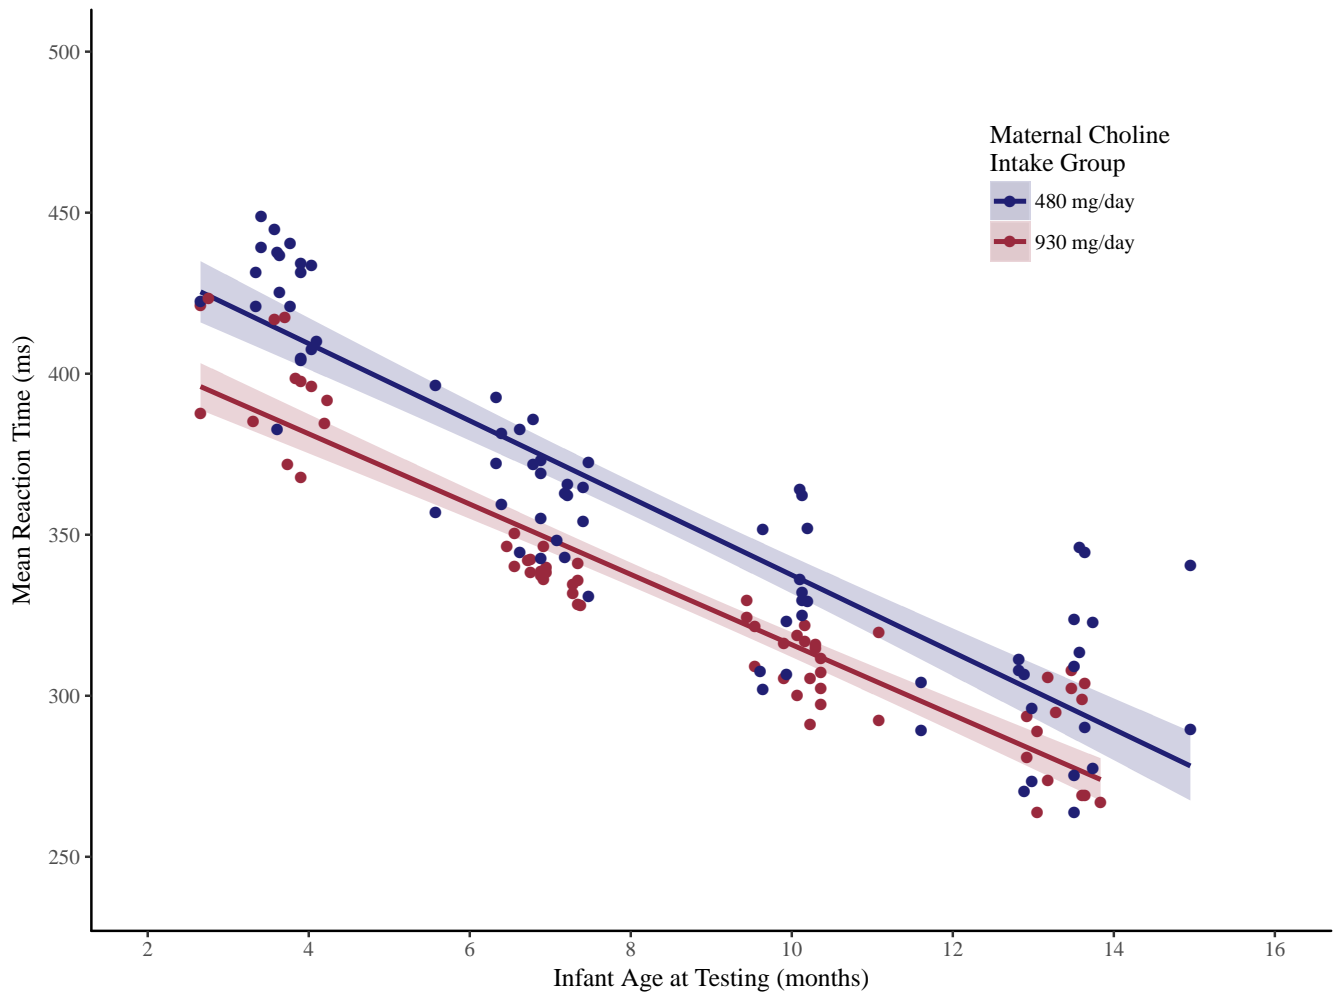

**Online Supplemental Figure 1: Infant Saccade Reaction Time as a Function of Age and Maternal Third Trimester Choline Intake Group Status.** Data points are predicted values from the unadjusted, a priori mixed regression model of maternal choline intake group on mean saccade reaction time. Each infant can contribute up to two data points for mean RT at each age, one for the baseline sequence and one for the post-baseline alternating sequence. The choline intake group effect is significant at  $P = 0.03$ . Lines represent least squares linear regression estimates and shadings represent 95% confidence limits
